# Supplementary material
Source: PubMed Central journal article supplement (PMC7362375)
Supplement: advancesADV2020001575-suppl1.pdf [file advancesADV2020001575-suppl1.pdf]

## SUPPLEMENTAL TABLE

**Supplemental Table 1:** Statistics for data collection and structure refinement

|                                               | Kindlin-3A'                                           | Kindlin-3A                                            |
|-----------------------------------------------|-------------------------------------------------------|-------------------------------------------------------|
| <b>Data Collection</b>                        |                                                       |                                                       |
| Space group                                   | <i>P</i> 2 <sub>1</sub> 2 <sub>1</sub> 2 <sub>1</sub> | <i>P</i> 2 <sub>1</sub> 2 <sub>1</sub> 2 <sub>1</sub> |
| Unit cell, <i>a</i> , <i>b</i> , <i>c</i> (Å) | 67.73, 129.17, 134.55                                 | 67.50, 131.49, 134.15                                 |
| Wavelength (Å)                                | 0.9785                                                | 0.9785                                                |
| Resolution (Å)                                | 46.74-2.35 (2.43-2.35)                                | 50.00-2.40 (2.49-2.40)                                |
| Rmerge (%) <sup>*†</sup>                      | 5.3 (71.4)                                            | 7.5 (59.4)                                            |
| No. of reflections, measured/unique           | 220848/49776                                          | 448625/48090                                          |
| I/sigma I <sup>*</sup>                        | 20.7 (2.1)                                            | 28.1 (3.2)                                            |
| Completeness (%) <sup>*</sup>                 | 99.64 (99.78)                                         | 99.6 (99.5)                                           |
| Redundancy <sup>*</sup>                       | 4.4 (4.6)                                             | 9.3 (9.1)                                             |
| <b>Refinement</b>                             |                                                       |                                                       |
| Resolution(Å)                                 | 46.74-2.35 (2.43-2.35)                                | 46.95-2.38(2.44-2.38)                                 |
| Unique reflections, work/free                 | 49774/2098                                            | 47727/2001                                            |
| R <sub>work</sub> (%) <sup>*‡</sup>           | 21.4 (29.6)                                           | 20.3 (27.2)                                           |
| R <sub>free</sub> (%) <sup>*‡</sup>           | 24.5(34.0)                                            | 25.7 (32.9)                                           |
| No.of atoms, protein/water                    | 6777/221                                              | 6835/181                                              |
| Molecules per asymmetric unit                 | 2                                                     | 2                                                     |
| Average B factor (Å <sup>2</sup> )            |                                                       |                                                       |
| All atoms                                     | 56.6                                                  | 61.1                                                  |
| Protein                                       | 56.9                                                  | 61.4                                                  |
| Water                                         | 48.7                                                  | 50.7                                                  |
| r.m.s.d-bond lengths (Å)                      | 0.008                                                 | 0.004                                                 |
| r.m.s.d-bond angles (°)                       | 1.28                                                  | 0.71                                                  |
| Ramachandran plot                             | 97.4/2.6/0.0                                          | 97.2/2.8/0.0                                          |
| Favored/allowed/outliers (%)                  |                                                       |                                                       |
| PDB code                                      | 6V9G                                                  | 6V97                                                  |

PDB, Protein Data Bank; r.m.s.d, root mean square deviation

\*The highest-resolution shell is shown in parentheses.

<sup>†</sup> $R_{\text{merge}} = \frac{\sum_h \sum_i |I_i - \langle I \rangle|}{\sum_h \sum_i I_i}$ , where  $I_i$  is the observed intensity of the  $i$ -th measurement of reflection  $h$ , and  $\langle I \rangle$  is the average intensity of that reflection obtained from multiple observations.

<sup>‡</sup> $R = \frac{\sum ||F_o| - |F_c||}{\sum |F_o|}$ , where  $F_o$  and  $F_c$  are the observed and calculated structural factors, respectively, calculated for all data.  $R_{\text{free}}$  is the  $R$  value obtained for a test set of reflections consisting of a randomly selected ~5% subset of data excluded from refinement.

## **SUPPLEMENTAL LEGENDS**

**Supplemental Figure 1:** Assessment of monomer-oligomer states of kindlin-3 $\Delta$  by packing quality. (A) The molecule pair of Kindlin-3 $\Delta$  in one asymmetric unit. (B) All the molecular pairs of kindlin-3 $\Delta$  that can form interface with the reference pair (green) are shown in different colors. (C) The interface areas formed between the reference kindlin-3 $\Delta$  and the surrounding ones were analyzed in PISA.

**Supplemental Figure 2:** Expression of DsRed-fused talin head domain and EGFP-fused kindlins in CHO- $\alpha$ IIB $\beta$ 3 cells. CHO- $\alpha$ IIB $\beta$ 3 cells were transiently co-transfected with DsRed-fused talin head domain (DsRed-TH) and EGFP-fused kindlins (EGFP-K1, EGFP-K2 and EGFP-K3). 24 hours after transfection, the cells were collected and lysed for SDS-PAGE and Western blotting.

**Supplemental Figure 3:** GST-EGFP-kindlin-3 forms dimers. For performing native PAGE, ~ 20  $\mu$ g of CHO- $\alpha$ IIB $\beta$ 3 cell lysate transiently expressing GST-EGFP-kindlin-3 (GST-EGFP-K3) was loaded into 4-16% Bis-Tris gels (Thermo Fisher Scientific). Gels were further transferred onto the PVDF membrane followed by Western blotting.

**Supplemental Figure 4:** Expression of EGFP-fused kindlin-3 in platelets. Washed platelets isolated from bone marrow transplanted mice were lysed for SDS-PAGE and Western blotting to examine the expression of EGFP-kindlin-3 (EGFP-K3) and the mutant carrying the E629AR640A mutations (EGFP-K3-E629AR640A). A homemade polyclonal anti-kindlin-3

antibody was used for Western blotting, as described previously [1]. Platelets (Kindlin-3<sup>-/-</sup>) isolated from poly(I:C) treated Kindlin-3<sup>fl/fl</sup>Mx1-Cre mice were used as a control.

## SUPPLEMENTAL FIGURES

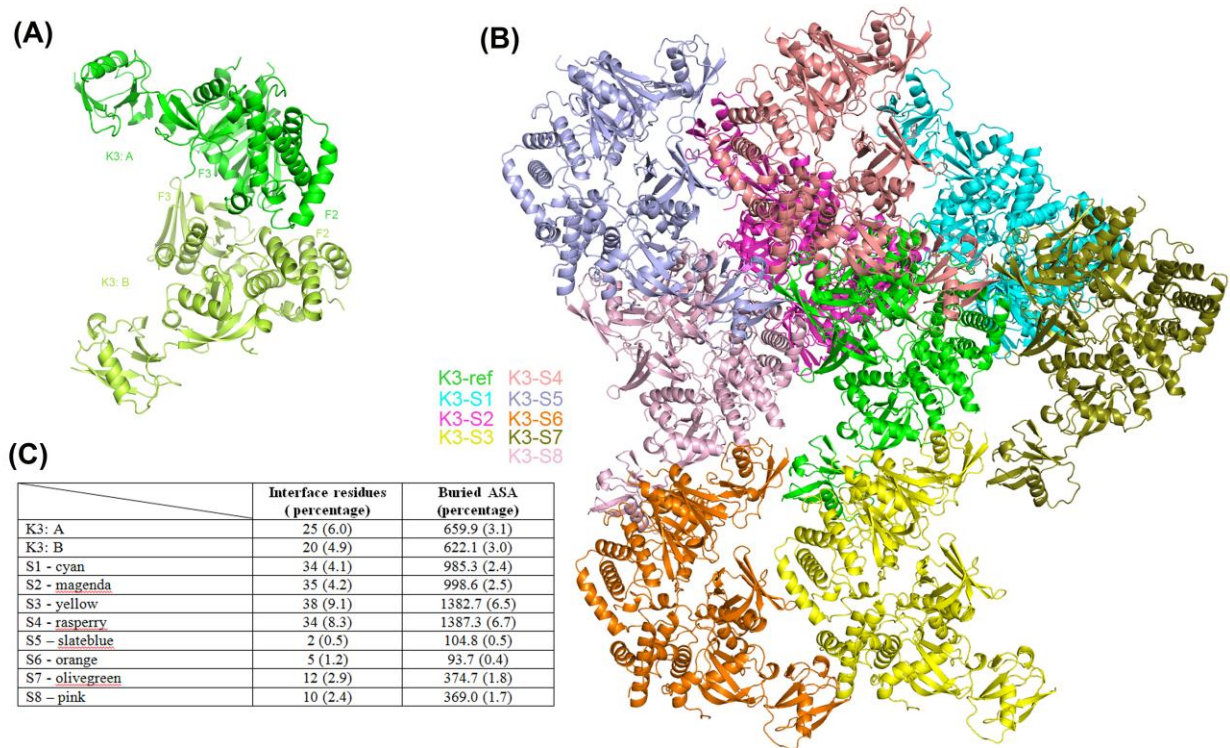

Supplemental Figure 1

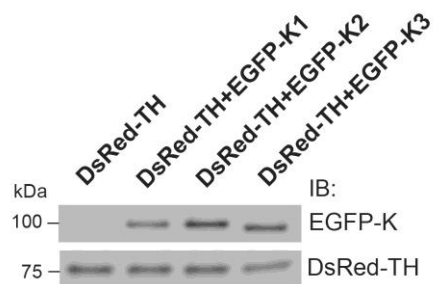

Supplemental Figure 2

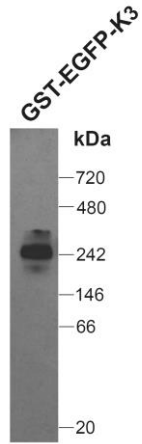

**Supplemental Figure 3**

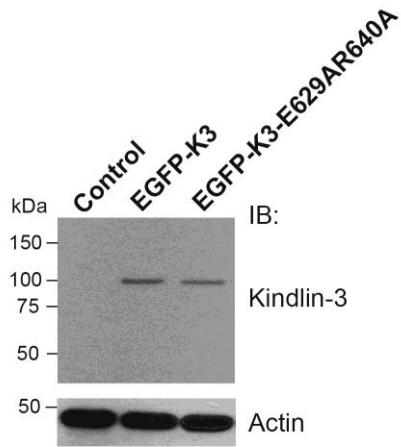

**Supplemental Figure 4**

[1] Gao J, Huang M, Lai J, Mao K, Sun P, Cao Z, et al. Kindlin supports platelet integrin  $\alpha$ IIb $\beta$ 3 activation by interacting with paxillin. *J Cell Sci.* 2017;130:3764-75.
